# Supplementary material for: CXCR3 signaling in glial cells ameliorates experimental autoimmune encephalomyelitis by restraining the generation of a pro-Th17 cytokine milieu and reducing CNS-infiltrating Th17 cells
Source: PubMed Central journal article supplement (PMC4828793; doi:10.1186/s12974-016-0536-4), 2016-04-11
Supplement: 12974_2016_536_MOESM3_ESM.pdf [file 12974_2016_536_MOESM3_ESM.pdf]

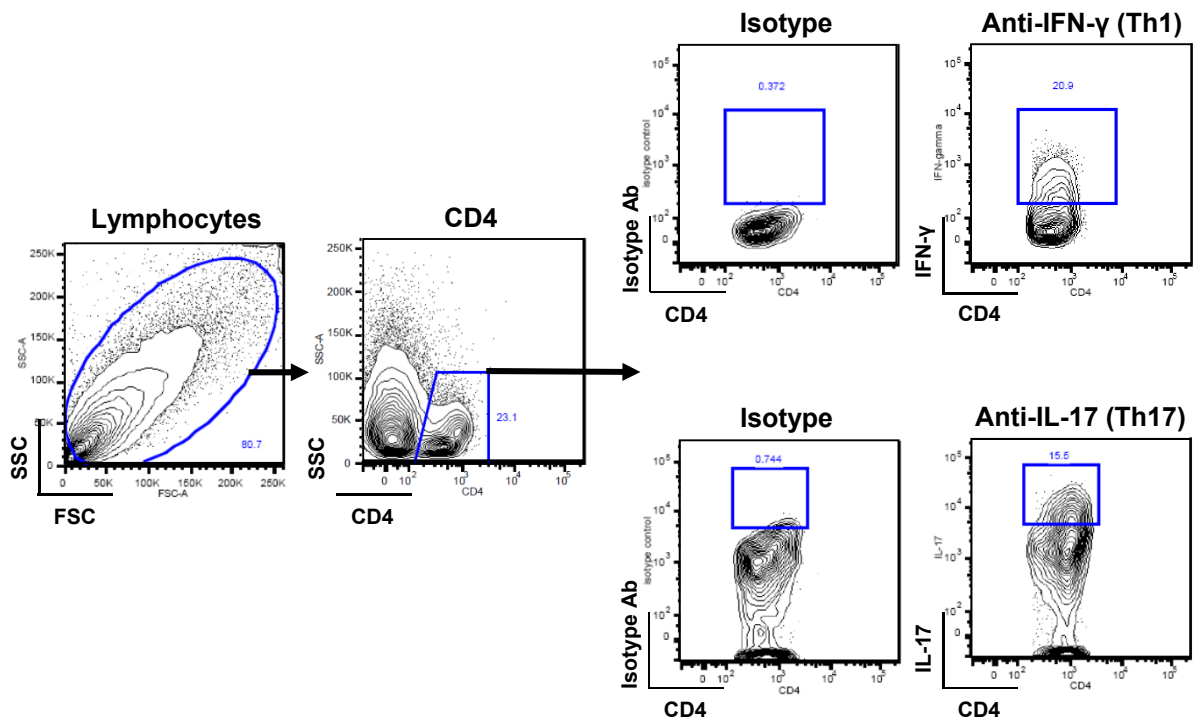

**Figure S3.** The gating strategy of FACS analysis to identify subpopulations of CD4<sup>+</sup>IL-17<sup>+</sup> and CD4<sup>+</sup>IFN- $\gamma$ <sup>+</sup> cells shown in Fig. 4. Mononuclear cells were isolated from the spinal cord of WT and CXCR3<sup>-/-</sup> recipient mice at day 12 post-immunization and subjected to FACS analysis. Lymphocytes were gated according to forward and side scatter and then subsequently gated on CD4<sup>+</sup> cells. CD4<sup>+</sup> cells were further gated to analyze IFN- $\gamma$ <sup>+</sup> cells (CD4<sup>+</sup>IFN- $\gamma$ <sup>+</sup>, Th1) and IL-17<sup>+</sup> cells (CD4<sup>+</sup>IL-17<sup>+</sup>, Th17). Data are representative of three independent experiments.
