# Supplementary material for: CXCR3 signaling in glial cells ameliorates experimental autoimmune encephalomyelitis by restraining the generation of a pro-Th17 cytokine milieu and reducing CNS-infiltrating Th17 cells
Source: PubMed Central journal article supplement (PMC4828793; doi:10.1186/s12974-016-0536-4), 2016-04-11
Supplement: 12974_2016_536_MOESM4_ESM.pdf [file 12974_2016_536_MOESM4_ESM.pdf]

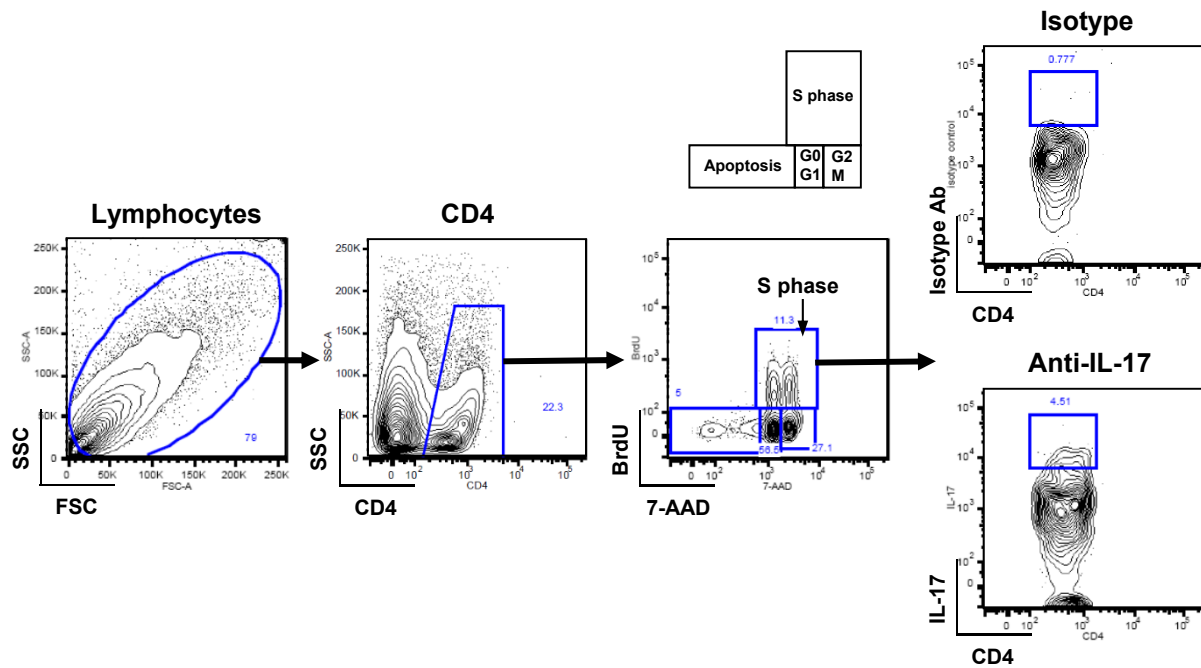

**Figure S4. The gating strategy of FACS analysis to identify proliferating Th17 cells shown in Fig. 5.** Mononuclear cells were isolated from the spinal cord of MOG-immunized WT and CXCR3<sup>-/-</sup> recipient mice at day12 post-immunization and subjected to FACS analysis. Lymphocytes were gated according to forward and side scatter and then subsequently gated on CD4<sup>+</sup> cells. CD4<sup>+</sup> cells were further gated to analyze cell cycle phase distribution. The phases of the cell cycle of CD4 cells were indicated (G0/G1: BrdU<sup>-</sup> 7-AAD<sup>+</sup>; G2/M: BrdU<sup>+</sup> 7-AAD<sup>high</sup>; S: BrdU<sup>+</sup> 7-AAD<sup>high</sup>; Apoptosis: BrdU<sup>-</sup> 7-AAD<sup>low</sup>). CD4<sup>+</sup> cells in S phase were further gated to analyze IL-17<sup>+</sup> cells (CD4<sup>+</sup>IL-17<sup>+</sup>, Th17). Data are representative of two independent experiments.
