# Supplementary material for: CXCR3 signaling in glial cells ameliorates experimental autoimmune encephalomyelitis by restraining the generation of a pro-Th17 cytokine milieu and reducing CNS-infiltrating Th17 cells
Source: PubMed Central journal article supplement (PMC4828793; doi:10.1186/s12974-016-0536-4), 2016-04-11
Supplement: 12974_2016_536_MOESM5_ESM.pdf [file 12974_2016_536_MOESM5_ESM.pdf]

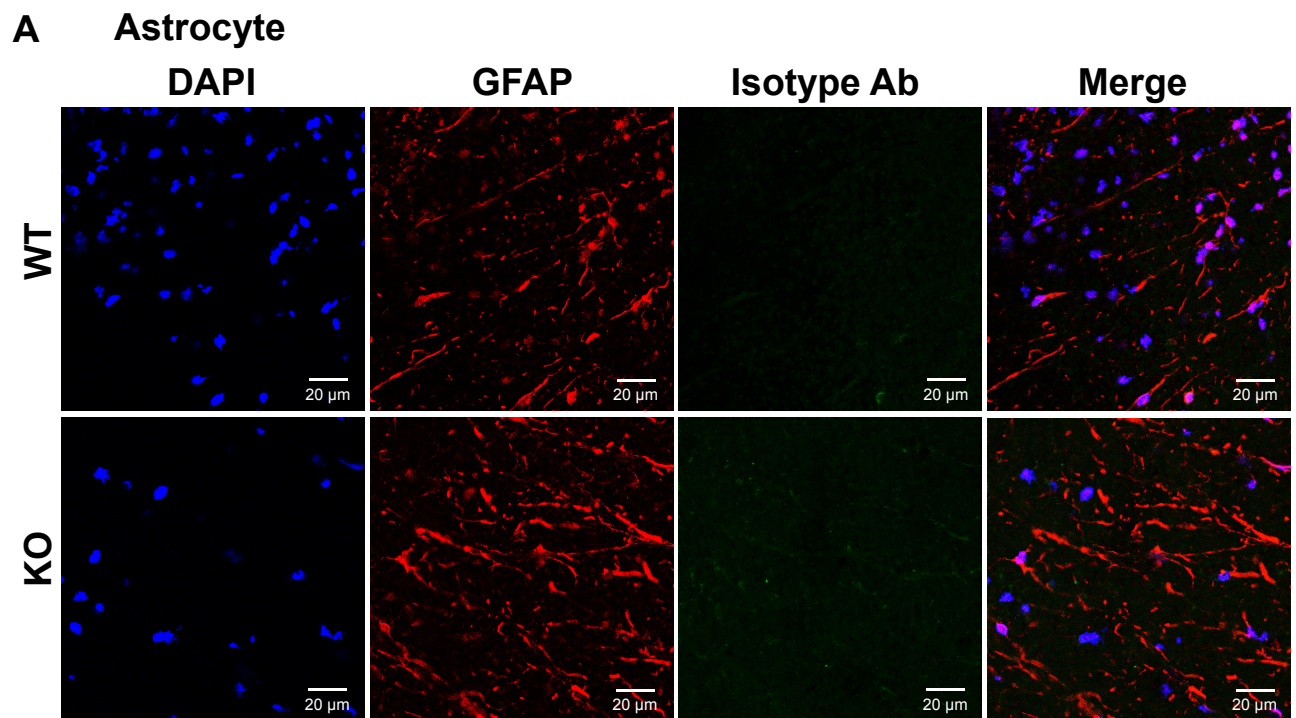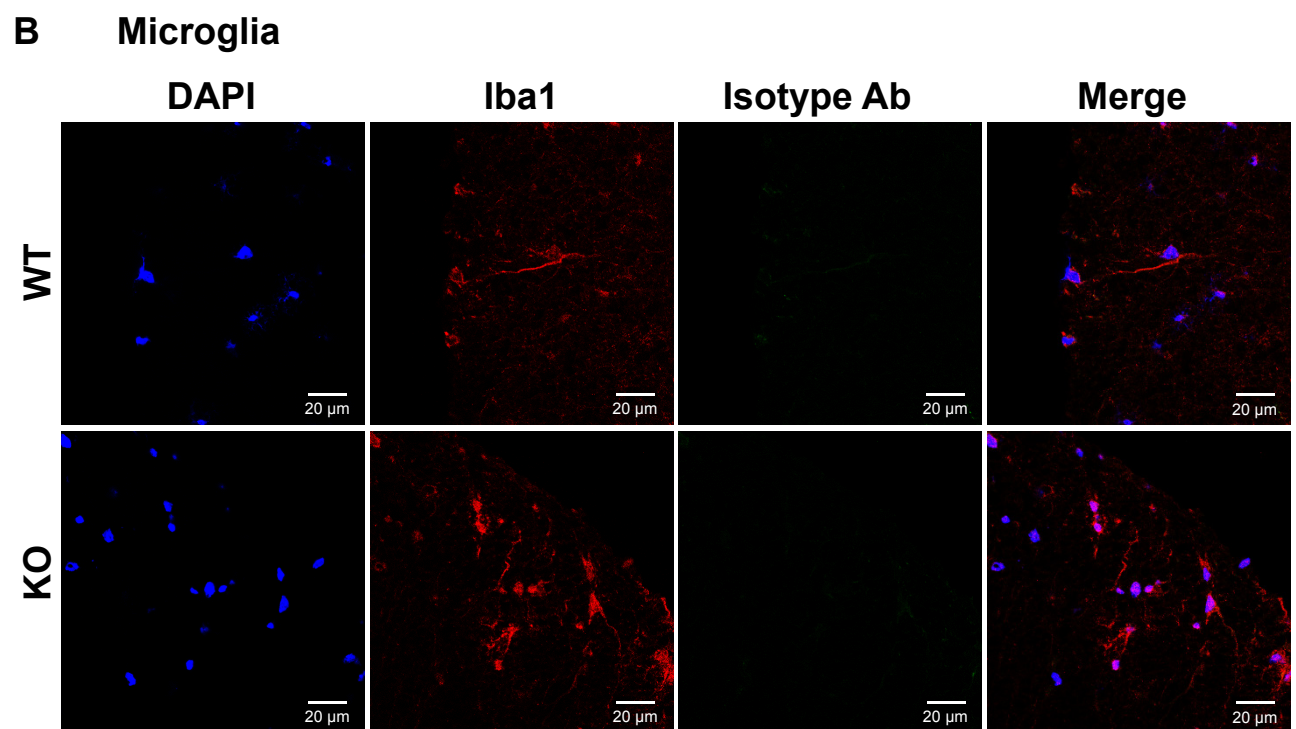

**Figure S5. Isotype control antibody for anti-CXCR3 in Fig. 9.** Frozen sections were subjected to immunofluorescence staining as describe in Figure 9 except that anti-CXCR3 was replaced with isotype control antibody. **A.** Astrocytes were marked as GFAP<sup>+</sup> cells. **B.** Microglia were marked as Iba1<sup>+</sup> cells. GFAP: red, Iba1: red, isotype control antibody for anti-CXCR3: green, DAPI: blue.
